# Supplementary material
Source: publisher figshare collection journal article supplement (https://acs.figshare.com/ndownloader/files/4758883)
Supplement: Supplementary file 1 [file 4758883]

## Supplementary Information

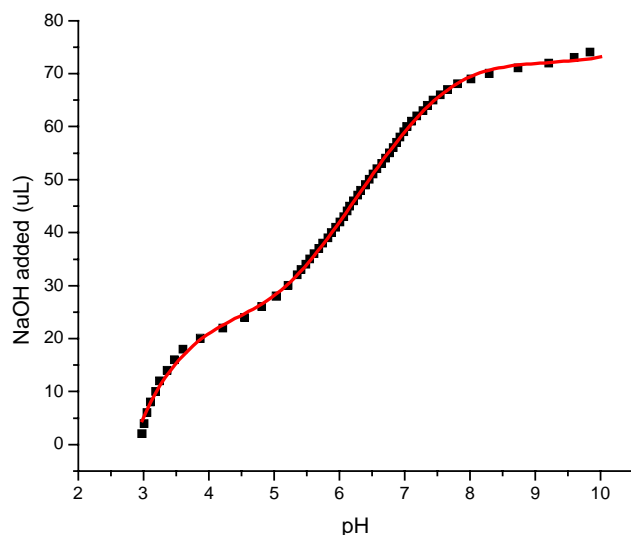

**S1.** pH titration of 1.25mM IRT1pep with 100uM NaOH. Red line indicates best fit according to algorithm described in Experimental Section.

## Table of Contents Synopsis

Isothermal titration calorimetry (ITC) was used to quantify the metal-binding thermodynamics of a 10 residue peptide corresponding to the His-rich sequence of the iron regulated transporter (IRT1) from *A. thaliana*. Stabilities of the metal-peptide complexes follow the Irving-Williams series, with lower affinities for  $\text{Fe}^{+2}$  and other transported metal ions. Enthalpic and entropic contributions were determined, including the entropy-driven high affinity for  $\text{Fe}^{+3}$ .
